# Supplementary material for: Correlative spectroscopy of silicates in mineralised nodules formed from osteoblasts
Source: Royal Society of Chemistry journal article supplement (doi:10.1039/c3nr02470a), 2013-01-01

# Electronic Supplementary Material (ESI) for Nanoscale

This journal is © The Royal Society of Chemistry 2013

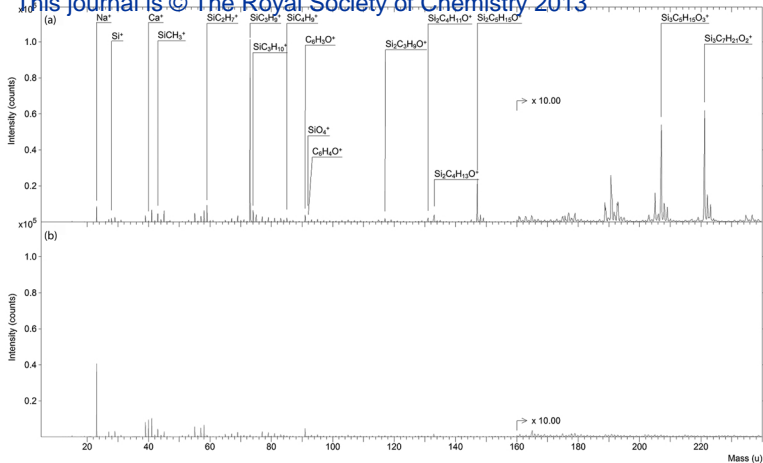

Supplement: c3nr02470a.pdf [file c3nr02470a.pdf]
